# Supplementary material
Source: PubMed Central journal article supplement (PMC5792311)

# Supplementary Digital Content. Swim Lane Diagrams of Process

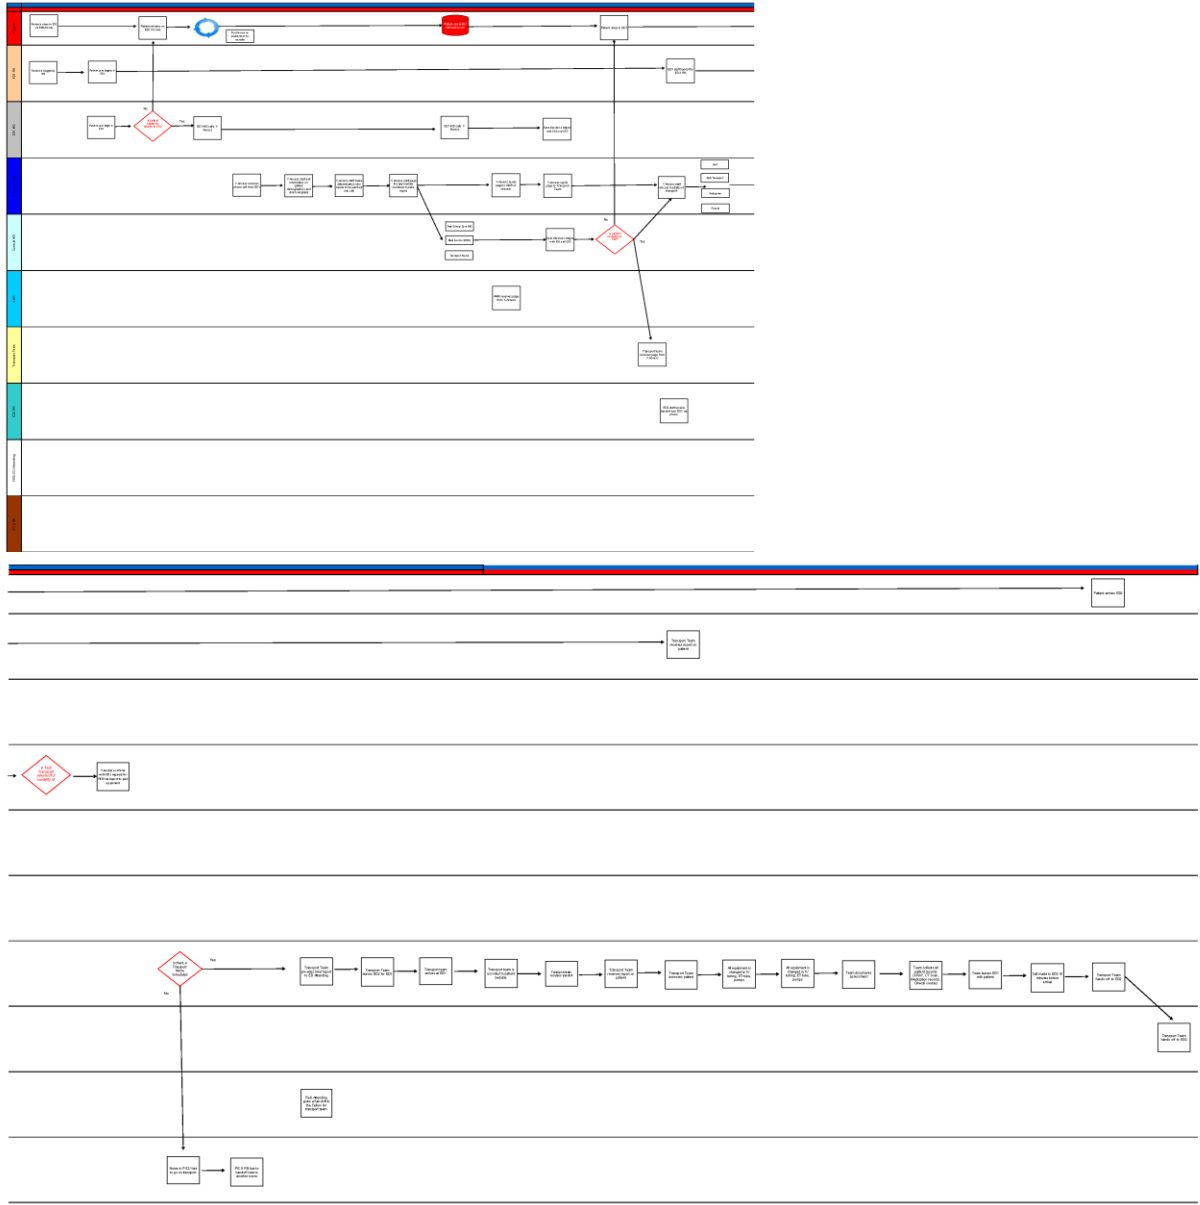

Supplement: NIHMS922313-supplement-supplement_1.pdf [file NIHMS922313-supplement-supplement_1.pdf]
